# Supplementary material for: Optimizing identification of consensus molecular subtypes in muscle-invasive bladder cancer: a comparison of two sequencing methods and gene sets using FFPE specimens
Source: Springer Nature journal article supplement (doi:10.1186/s12885-023-11016-9), 2023-06-03
Supplement: MOESM1 [file 25445622]

### Supplementary material

Optimizing identification of consensus molecular subtypes in muscle-invasive bladder cancer: A comparison of two sequencing methods and gene sets using FFPE specimens

**Table S1:** *ESSEN1* gene set [1]

|         |       |          |        |
|---------|-------|----------|--------|
| CYP2J2  | KRT6A | TUBB2B   | SAA1   |
| ERBB2   | KRT6B | PLEKHG4B | CRTAC1 |
| ERBB3   | DSC2  | C7       | CTSE   |
| FGFR3   | DSC3  | COMP     | MSN    |
| FOXA1   | DSG2  | SFRP4    | NR3C1  |
| GATA3   | DSG3  | SGCD     | PADI3  |
| KRT20   | GSDMC | CDH2     | ACTC1  |
| PPARG   | PI3   | SNAI1    | ACTG2  |
| UPK1A   | TGM1  | TWIST1   | CNN1   |
| UPK2    | TP63  | VIM      | DES    |
| CD44    | CHGB  | ZEB1     | FLNC   |
| CDH3    | ENO2  | ZEB2     | MFAP4  |
| COL17A1 | GNG4  | CD274    | MYH11  |
| KRT14   | NCAM1 | CXCL11   | PCP4   |
| KRT16   | PEG10 | IDO1     | PGM5   |
| KRT1    | SCG2  | L1CAM    | CHGA   |
| KRT5    | SOX2  | PDCD1LG2 | CDKN2A |

**Table S2:** *ESSEN2* gene set [2]

|        |          |        |        |
|--------|----------|--------|--------|
| CYP2J2 | KRT5     | RND2   | SFRP4  |
| ERBB2  | KRT6A    | SV2A   | SGCD   |
| FGFR3  | DSC2     | TUBB2B | CD274  |
| FOXA1  | DSG3     | CRTAC1 | CXCL11 |
| GATA3  | PI3      | CTSE   | IDO1   |
| KRT20  | APLP1    | MSN    | SAA1   |
| PPARG  | CHGB     | NR3C1  | ACTC1  |
| UPK1A  | ENO2     | CDH2   | ACTG2  |
| UPK2   | GNG4     | TWIST1 | CNN1   |
| CD44   | MSI1     | VIM    | MYH11  |
| CDH3   | PEG10    | ZEB1   | PGM5   |
| KRT14  | PLEKHG4B | COMP   | CDKN2A |

## Figures

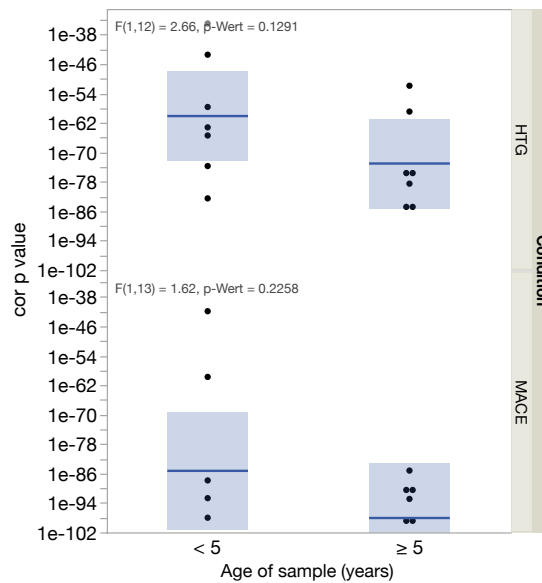

**Figure S1:** Comparison of correlation p-value between for samples older and younger than five years for MACE and HTG. MACE: <5years: median  $2e-93$ ;  $\geq 5$ years: median  $6e-94$ ; HTG: <5years: median  $7e-64$ ;  $\geq 5$ years median  $1e-76$ ;  $p > 0.1$ , respectively.

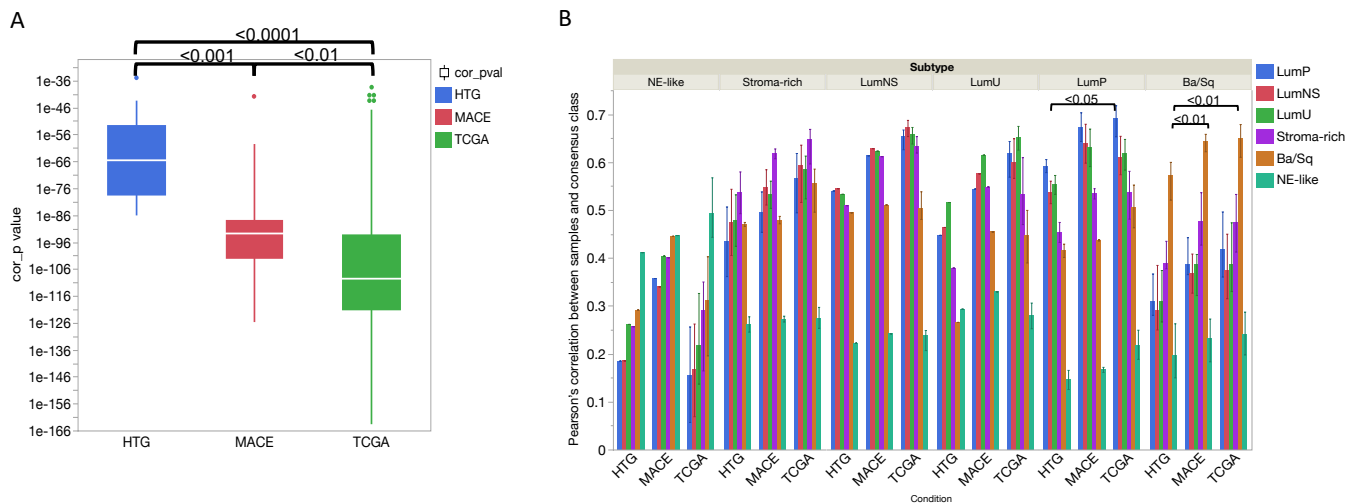

**Figure S2:** A: Comparison of p-values associated to the Pearson's correlation of the samples with the nearest centroid ( $cor\ p\_value$ ) for each method (HTG and MACE) and to the TCGA data set. B: Pearson's correlation between samples and each consensus class stratified for the different methods and for the called consensus class.

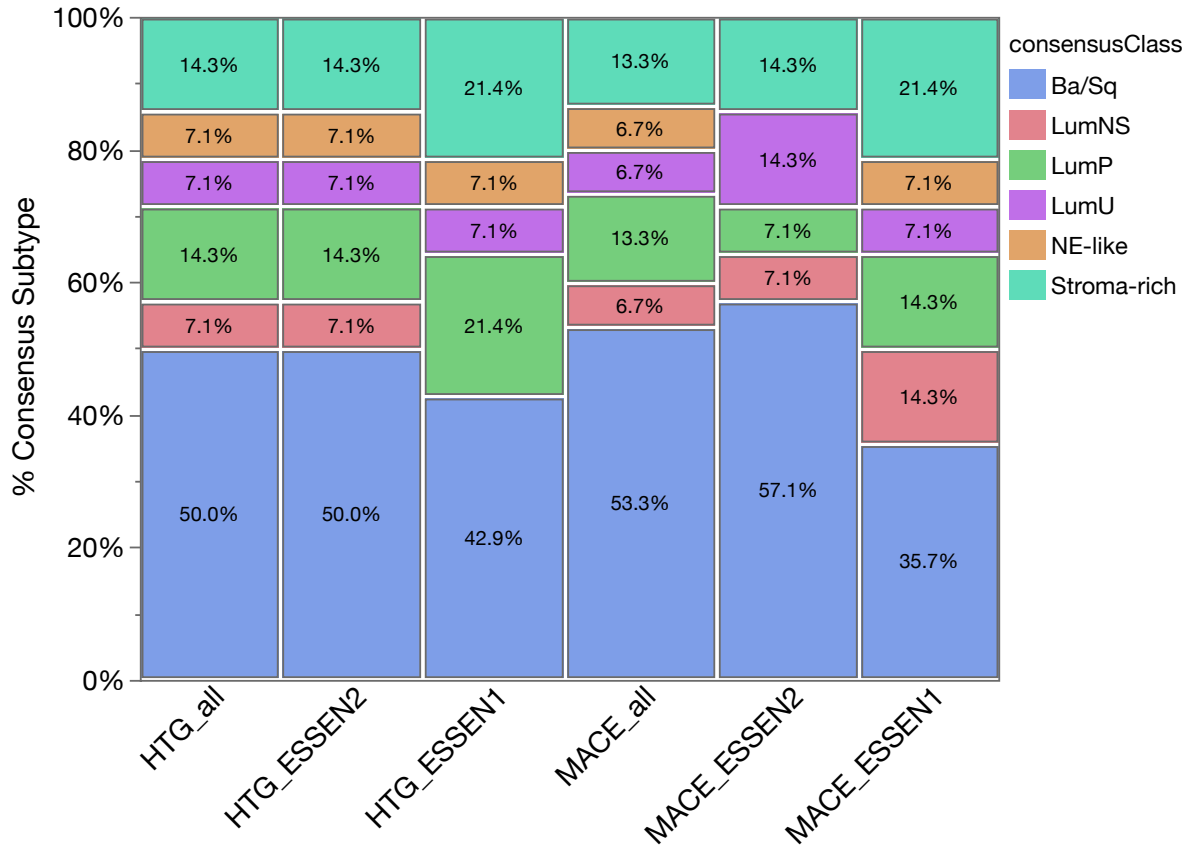

Figure S3: Relative distribution of subtype calls with each method and gene panels

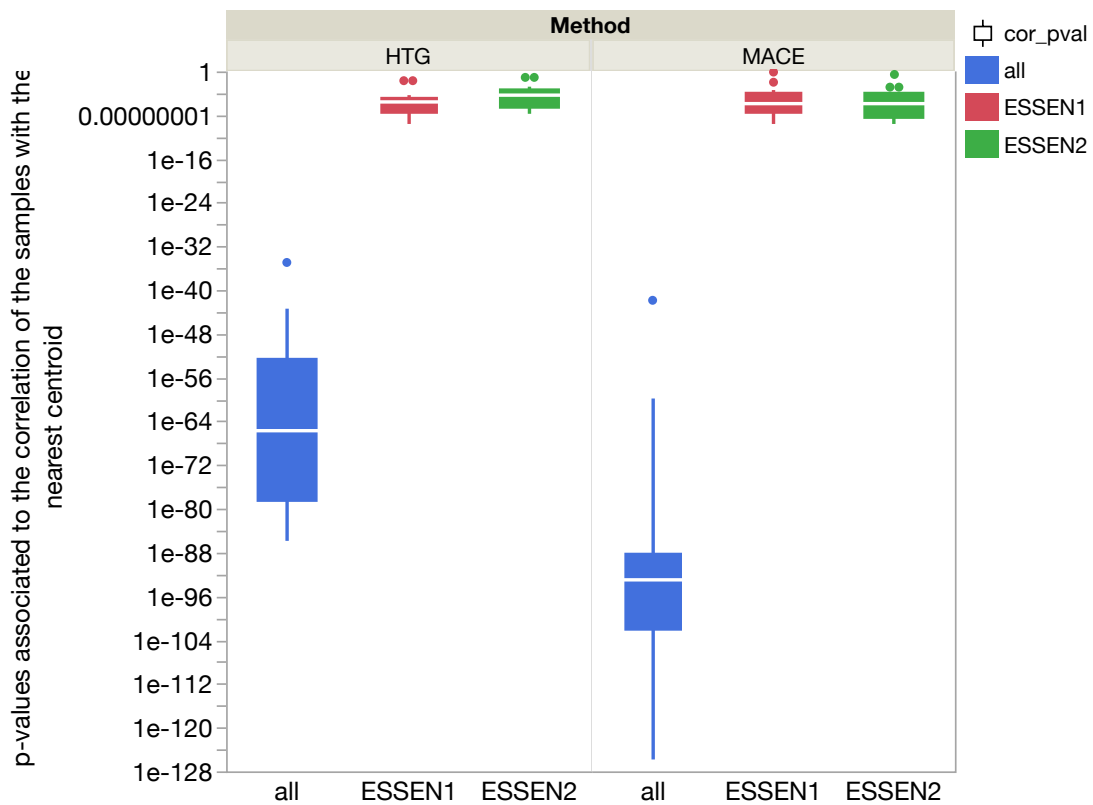

**Figure S4: A:** Comparison of *p*-values associated to the Pearson's correlation of the samples with the nearest centroid for each method (HTG and MACE) for the ESSEN1 and ESSEN2 gene panels.

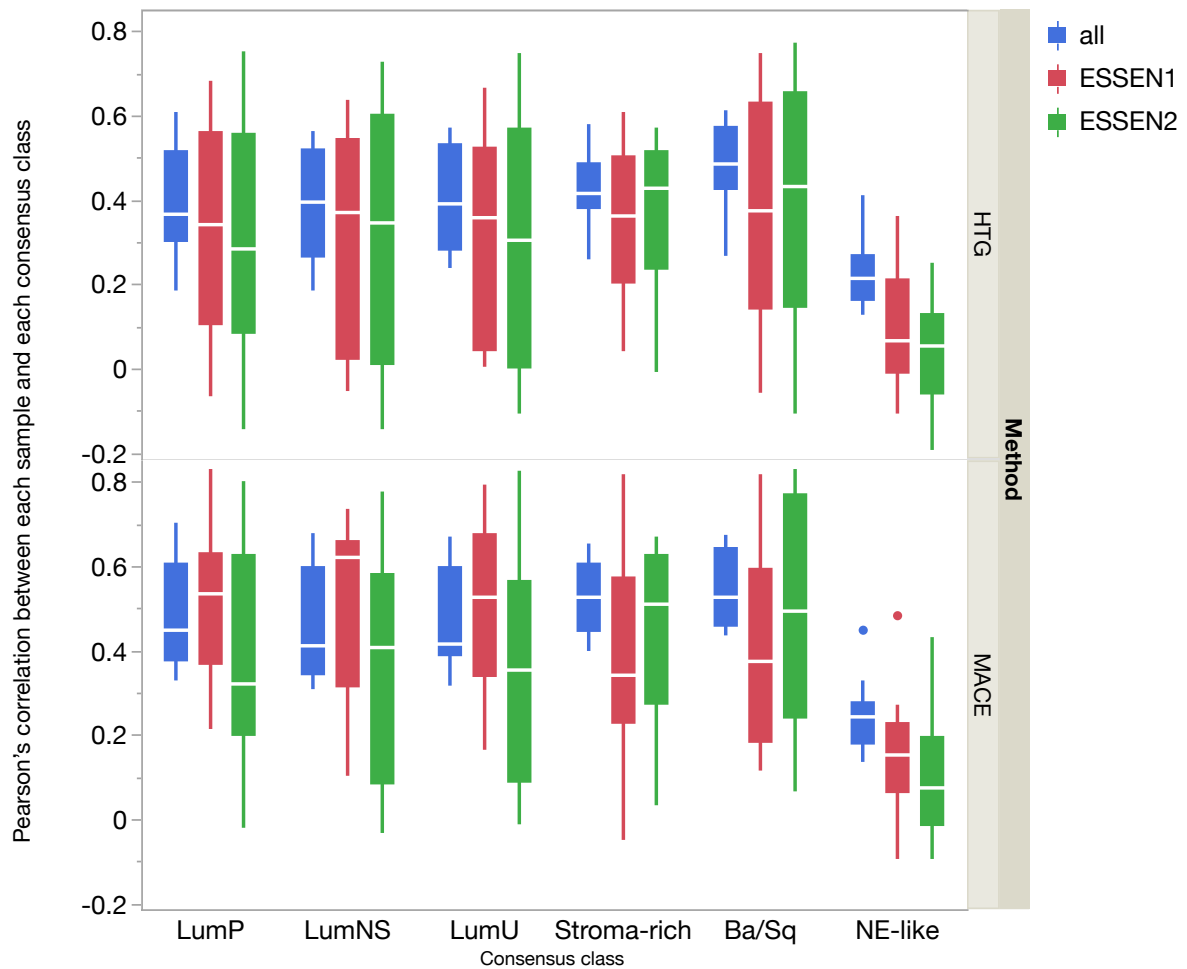

**Figure S5:** Pearson's correlation between samples and each consensus class stratified for the different gene sets (comprehensive transcriptomic data = all; ESSEN1 and ESSEN2) and for the called consensus class.

## References

1. Olah C, Hahnen C, Nagy N, Musial J, Varadi M, Nyiro G, Gyorffy B, Hadaschik B, Rawitzer J, Ting S *et al*: **A quantitative polymerase chain reaction based method for molecular subtype classification of urinary bladder cancer-Stromal gene expressions show higher prognostic values than intrinsic tumor genes.** *International journal of cancer Journal international du cancer* 2021.
2. Olah C, Reis H, Hoffmann MJ, Mairinger F, Ting S, Hadaschik B, Krafft U, Grunwald V, Nyirady P, Varadi M *et al*: **Predictive value of molecular subtypes and APOBEC3G for adjuvant chemotherapy in urothelial bladder cancer.** *Cancer Med* 2022.
